# Supplementary material
Source: HighWire-hosted journal article supplement (https://www.cmajopen.ca/highwire/filestream/85473/field_highwire_adjunct_files/1/2020-0188-2-at.pdf)
Supplement: 2020-0188-2-at.pdf [file 2020-0188-2-at.pdf]

Transition Probabilities for 10-year and Lifetime Models; values listed at age 45 (mean age at first cycle Markov model)

|                               | Risk per annum, value assigned at age 45* | Plausible range | Variables used in determination | Source           | Distribution |
|-------------------------------|-------------------------------------------|-----------------|---------------------------------|------------------|--------------|
| Mortality with no comorbidity |                                           |                 |                                 |                  |              |
| <i>Surgical</i>               | 0.00137                                   | 0.00130-0.00190 | Age, sex                        | <sup>1-3</sup>   | Lognormal    |
| <i>Medical</i>                | 0.00191                                   | 0.00137-0.00455 | Age, sex                        | <sup>1-3</sup>   | Lognormal    |
| <i>Standard Care</i>          | 0.00274                                   | 0.00137-0.0980  | Age, sex                        | <sup>1-3</sup>   | Lognormal    |
| Mortality with Diabetes       |                                           |                 |                                 |                  |              |
| <i>Surgical</i>               | 0.00274                                   | 0.00274-0.00821 | Age, sex                        | <sup>1,4,5</sup> | Lognormal    |

|                                                |         |                     |          |           |           |
|------------------------------------------------|---------|---------------------|----------|-----------|-----------|
| <i>Medical</i>                                 | 0.00383 | 0.00274-<br>0.0138  | Age, sex | 1,4,5     | Lognormal |
| <i>Standard Care</i>                           | 0.00547 | 0.00274-<br>0.588   | Age, sex | 1,4,5     | Lognormal |
| Mortality with<br>Hypertension                 |         |                     |          |           |           |
| <i>Surgical</i>                                | 0.00274 | 0.00274-<br>0.0038  | Age, sex | 1,6-8     | Lognormal |
| <i>Medical</i>                                 | 0.00383 | 0.00274-<br>0.00460 | Age, sex | 1,6-8     | Lognormal |
| <i>Standard Care</i>                           | 0.00548 | 0.00274-<br>0.196   | Age, sex | 1,6-8     | Lognormal |
| Mortality with<br>Diabetes and<br>Hypertension |         |                     |          |           |           |
| <i>Surgical</i>                                | 0.00548 | 0.00548-<br>0.164   | Age, sex | 1,4,5,7,8 | Lognormal |
| <i>Medical</i>                                 | 0.00767 | 0.00548-<br>0.0276  | Age, sex | 1,4,5,7,8 | Lognormal |
| <i>Standard Care</i>                           | 0.0110  | 0.00548-<br>1.18    | Age, sex | 1,4,5,7,8 | Lognormal |

|                          |        |               |                                               |                 |           |
|--------------------------|--------|---------------|-----------------------------------------------|-----------------|-----------|
| Diabetes acquisition     |        |               |                                               |                 |           |
| <i>Surgical</i>          | 0.0077 | 0.0073-0.077  | Age                                           | 4,5,9,10        | Beta      |
| <i>Medical</i>           | 0.0111 | 0.0077-0.200  | Age, BMI                                      | 4,5,9<br>10     | Lognormal |
| <i>Standard Care</i>     | 0.0157 | 0.0077-0.200  | Age, BMI                                      | 9<br>4,5,10     | Lognormal |
| Diabetes Resolution      |        |               |                                               |                 |           |
| <i>Surgical</i>          | 0.0162 | 0-0.0162      | Age, sex                                      | 9,11            | Lognormal |
| <i>Medical</i>           | 0      | 0-0.0162      | -                                             | 9,11            | -         |
| <i>Standard Care</i>     | 0      | 0-0.0162      | -                                             | 9,11            | -         |
| Hypertension acquisition |        |               |                                               |                 |           |
| <i>Surgical</i>          | 0.0245 | 0.0186-0.0245 | Age, sex, blood pressure, smoking status, BMI | 7,12,13<br>9,14 | Beta      |
| <i>Medical</i>           | 0.0808 | 0.023-0.85    | Age, sex, blood pressure,                     | 7,9,12-14       | Beta      |

Appendix 2, as supplied by the authors. Appendix to: Lester ELW, Padwal RS, Birch DW, et al. The real world cost-effectiveness of bariatric surgery for the treatment of severe obesity: a cost-utility analysis. *CMAJ Open* 2021. DOI:10.9778/cmajo.20200188. Copyright © 2021 The Author(s) or their employer(s). To receive this resource in an accessible format, please contact us at [cmajgroup@cmaj.ca](mailto:cmajgroup@cmaj.ca).

|                            |                           |                          |                                                           |         |          |
|----------------------------|---------------------------|--------------------------|-----------------------------------------------------------|---------|----------|
|                            |                           |                          | smoking<br>status, BMI                                    |         |          |
| <i>Standard Care</i>       | 0.0917                    | 0.023-0.85               | Age, sex,<br>blood<br>pressure,<br>smoking<br>status, BMI | 7,12-14 | Weibull  |
| Hypertension<br>Resolution |                           |                          |                                                           |         |          |
| <i>Surgical</i>            | 4.813<br>$\times 10^{-5}$ | 0-4.813 $\times 10^{-5}$ | Age, sex                                                  | 9,11    | Logistic |
| <i>Medical</i>             | 0                         | 0-4.813 $\times 10^{-5}$ | -                                                         | 9,11    | -        |
| <i>Standard Care</i>       | 0                         | 0-4.813 $\times 10^{-5}$ | -                                                         | 9,11    | -        |

\* Rates are determined by evidence found in the literature and informed by the primary APPLES data. For instance, mortality tables from Statistics Canada were employed to determine mortality rates, adjusting for the sex, BMI and comorbidity states as determined from the APPLES data. Using the same tables, the rate of mortality increased with increasing age.

1. Canada S. Probability of dying by age and sex, Canada, 2009/2011. <http://www.statcan.gc.ca/pub/91-209-x/2013001/article/11867/fig/desc/desc04-eng.htm>. Published 2011. Accessed 2016.
2. Kitahara CM, Flint AJ, Berrington de Gonzalez A, et al. Association between class III obesity (BMI of 40-59 kg/m<sup>2</sup>) and mortality: a pooled analysis of 20 prospective studies. *PLoS Med*. 2014;11(7):e1001673.
3. Orpana HM, Berthelot JM, Kaplan MS, Feeny DH, McFarland B, Ross NA. BMI and mortality: results from a national longitudinal study of Canadian adults. *Obesity (Silver Spring)*. 2010;18(1):214-218.
4. Canada PHAo. *Report from the National Diabetes Surveillance System: Diabetes in Canada, 2009*. Ottawa, Canada 2009.
5. Canada PHAo. *Diabetes in Canada: Facts and Figures from a Public Health Perspective*. In: Department of Health GoC, ed. Ottawa 2011.
6. Jerant A, Franks P. Body mass index, diabetes, hypertension, and short-term mortality: a population-based observational study, 2000-2006. *J Am Board Fam Med*. 2012;25(4):422-431.
7. Canada PHAo. *Report from the Canadian Chronic Disease Surveillance System: Hypertension in Canada, 2010*. Ottawa, Canada 2010.
8. Padwal RS, Bienek A, McAlister FA, Campbell NR, Outcomes Research Task Force of the Canadian Hypertension Education P. Epidemiology of Hypertension in Canada: An Update. *Can J Cardiol*. 2016;32(5):687-694.
9. Sjostrom L. Bariatric surgery and reduction in morbidity and mortality: experiences from the SOS study. *Int J Obes (Lond)*. 2008;32 Suppl 7:S93-97.
10. Ganz ML, Wintfeld N, Li Q, Alas V, Langer J, Hammer M. The association of body mass index with the risk of type 2 diabetes: a case-control study nested in an electronic health records system in the United States. *Diabetol Metab Syndr*. 2014;6(1):50.
11. Padwal RS, Majumdar SR, Klarenbach S, et al. The Alberta population-based prospective evaluation of the quality of life outcomes and economic impact of bariatric surgery (APPLES) study: background, design and rationale. *BMC Health Serv Res*. 2010;10:284.
12. Parikh NI, Pencina MJ, Wang TJ, et al. A risk score for predicting near-term incidence of hypertension: the Framingham Heart Study. *Ann Intern Med*. 2008;148(2):102-110.
13. Echouffo-Tcheugui JB, Batty GD, Kivimaki M, Kengne AP. Risk models to predict hypertension: a systematic review. *PLoS One*. 2013;8(7):e67370.
14. Shuger SL, Sui X, Church TS, Meriwether RA, Blair SN. Body mass index as a predictor of hypertension incidence among initially healthy normotensive women. *Am J Hypertens*. 2008;21(6):613-619.
